# Supplementary material
Source: PubMed Central journal article supplement (PMC1458758)

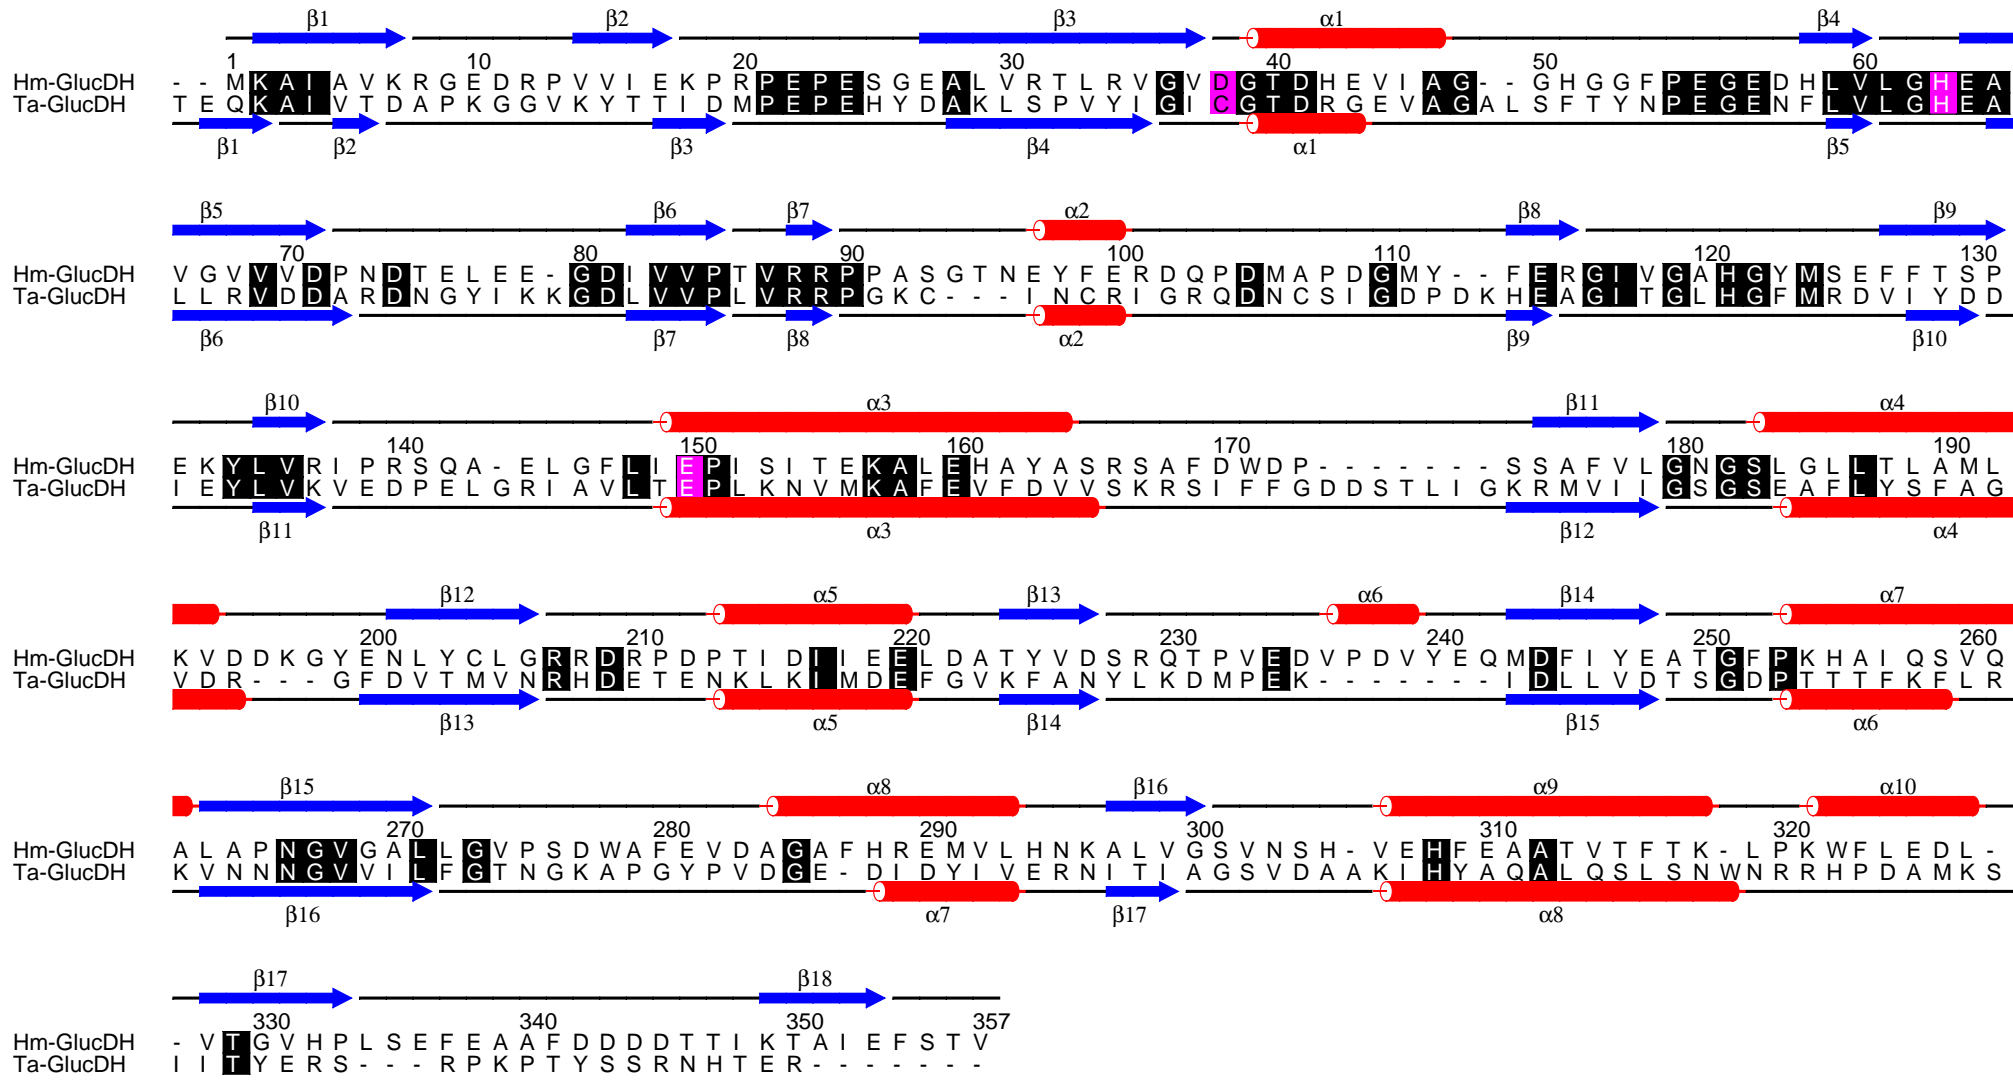

Supplement: pnas_0508854103_1.pdf [file pnas_0508854103_1.pdf]
